# Supplementary material for: A naphthalimide-based fluorescent probe for the highly sensitive and selective detection of nerve agent mimic DCP in solution and vapor phase
Source: Royal Society of Chemistry journal article supplement (doi:10.1039/d0nj00416b), 2020-01-01

## Supporting information for

# Naphthalimide-based fluorescent probe for highly sensitive and selective detection of nerve agent mimic DCP in solution and vapor phase

Hui Xu<sup>†</sup>, Han Zhang<sup>†</sup>, Lei Zhao, Cheng Peng, Guohua Liu, Tanyu Cheng\*

Key Laboratory of Resource Chemistry of Ministry of Education, Shanghai Key Laboratory of Rare Earth Functional Materials, Shanghai Normal University, No.100 Guilin Rd, Shanghai 200241, P. R. China. Tel.: +86 21 64321819. E-mail: [tycheng@shnu.edu.cn](mailto:tycheng@shnu.edu.cn)

## 1. Determination of detection limit

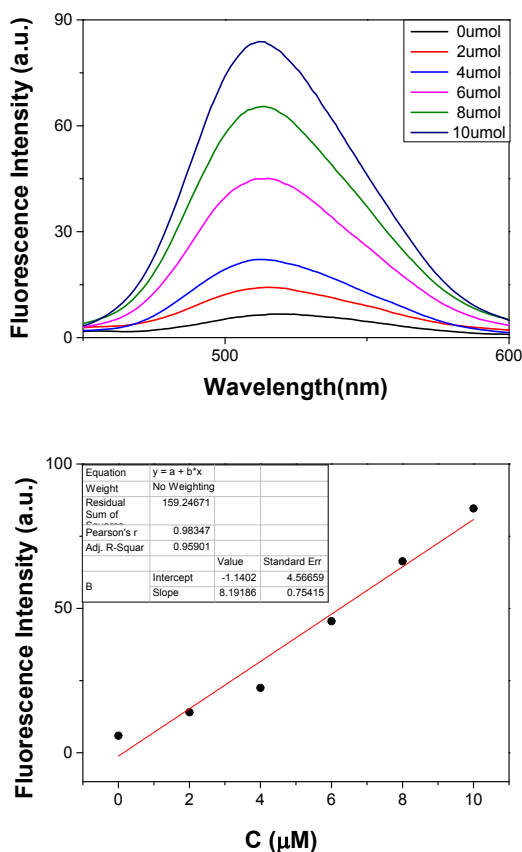

**Figure S1.** Fluorometric determination of limit of DCP to probe **2** in DMF.

$LOD = 3 S_b / m$  ( $S_b$  is the ratio signal and noise,  $m$  is the slope of the linearity)

Slope = 8.19186                  Standard Deviation = 0.015169                   $K=3$

$LOD = K \times \text{Standard Deviation} / \text{Slope} = 3 \times 0.015169 / 8.19186 = 0.0055 \mu\text{M} = 5.5 \text{ nm}$

## 2. The LOD of reported fluorescent probe for DCP

| Probe                                                                               | LOD                   | References                                 |
|-------------------------------------------------------------------------------------|-----------------------|--------------------------------------------|
| 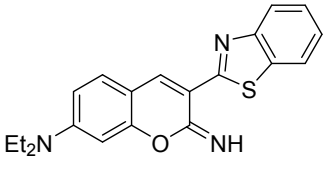   | 0.065 $\mu\text{M}$   | J. Hazard. Mater., 2018, 342, 10–19        |
|    | 0.21 $\mu\text{M}$    | J. Hazard. Mater., 2018, 342, 10–19        |
|    | 0.17 ppm              | Chem. Commun., 2013, 49, 10474–10476       |
|   | 25 ppm                | Chem. Commun., 2011, 47, 11468–11470       |
|  | 21 nM                 | J. Mater. Chem. C, 2017, 5, 7337--7343     |
|  | 8 nM                  | ACS Sens. 2017, 2, 834–841                 |
|  | 21.9 nM               | Chem. Eur. J. 2017, 23, 7785 –7790         |
|  | 0.142 $\mu\text{mol}$ | Sens. Actuators B Chem. 235 (2016) 447–456 |

|                                                                                     |           |                                              |
|-------------------------------------------------------------------------------------|-----------|----------------------------------------------|
| 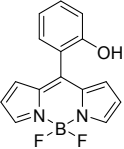   | 0.71 μg/L | Anal. Chem. 2016, 88, 9259–9263              |
|    | 1.87 ppb  | Sensor. Actuators B Chem. 255 (2018) 176–182 |
|    | 3.36 μmol | Sensor. Actuators B Chem. 238 (2017) 145–149 |
|    | 140 nM    | Dyes and Pigments 170 (2019) 107585          |
|   | 88 nm     | Anal. Chem. 2019, 91, 12070–12076            |
|  | 10.4 nm   | Anal. Chem. 2019, 91, 10979–10983            |
|  | 9.6 nm    | Dyes and Pigments 171 (2019) 107712          |
|  | 5.5 nM    | This work                                    |

**Table S1.** The LOD of reported fluorescent probe for DCP

### 3. HCl effect

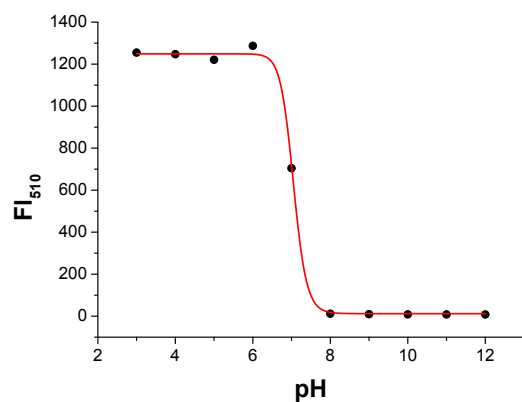

**Figure S2.** The fluorescence intensity of probe **2** (10.0  $\mu\text{M}$ ) at 510 nm in the presence and absence of DCP in DMF: H<sub>2</sub>O 1:1 v/v (10.0  $\mu\text{M}$ ) under different pH (3.0-12.0)

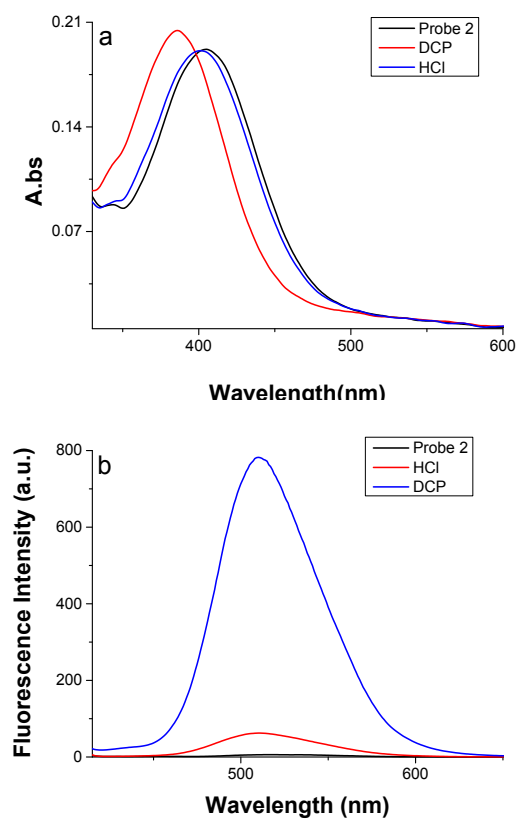

**Figure S3.** (a) Absorption and (b) emission spectra of probe **2** (10  $\mu\text{M}$ ) in the presence of DCP (50.0  $\mu\text{M}$ ) or HCl (50.0  $\mu\text{M}$ ) in DMF.

## 4. Kinetic study

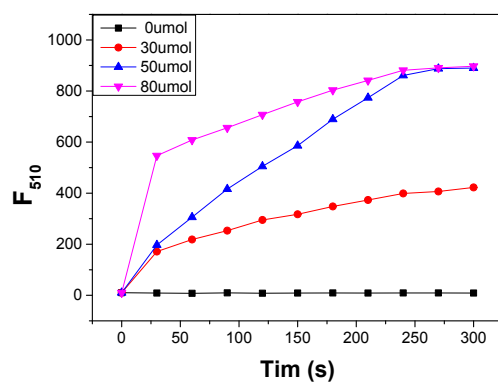

Fig. S4. Kinetic profile of the reaction between probe 2 and DCP in DMF

## 5. Fluorescence images of above solutions

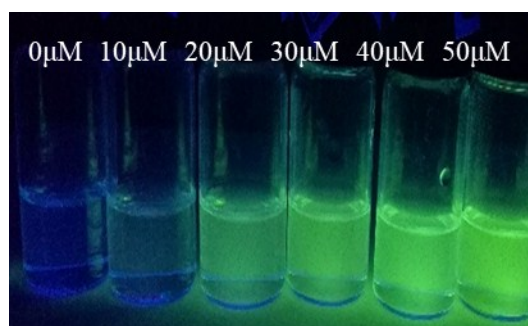

Fig. S5. Photographs of probe 2 in DMF with different amounts of DCP after a 5 min incubation under UV light (365 nm).

## 6. Quantum yield

$$\Phi_I = \frac{\Phi_B I_B A_B \lambda_{exB} \eta_I}{I_B A_I \lambda_{exI} \eta_B}$$

Where  $\phi$  is quantum yield; I is integrated area under the corrected emission spectra; A is absorbance at the excitation wavelength;  $\lambda_{ex}$  is the excitation wavelength;  $\eta$  is the refractive index of the solution; the subscripts I and B refer to the unknown and the standard, respectively. Fluorescence quantum yields were determined in solution, using Rhodamine B (Acid) in alcohol as a standard ( $\Phi_F = 0.49$ ).  $\Phi_F = 0.005$  for probe 2 and  $\Phi_F = 0.48$  for probe 2@DCP.

## 7. Characterization

### NMR spectra of probe 2

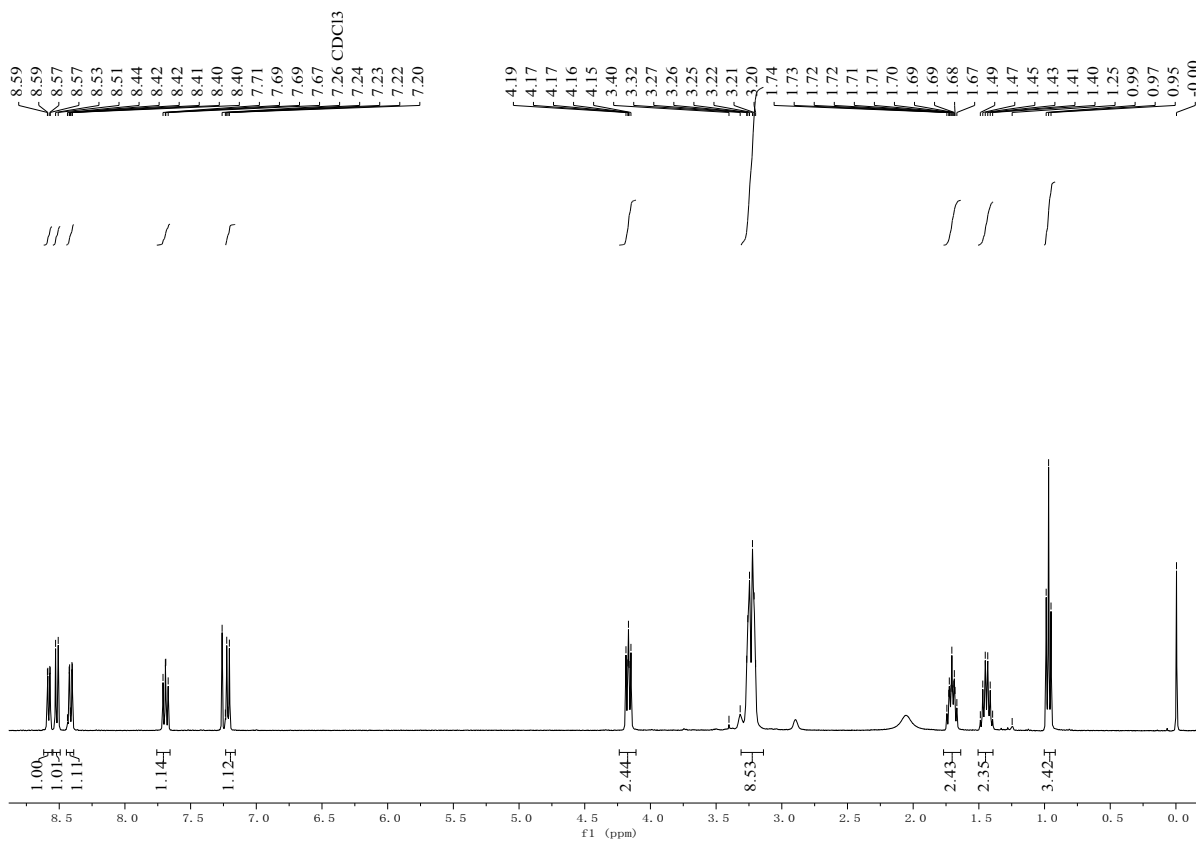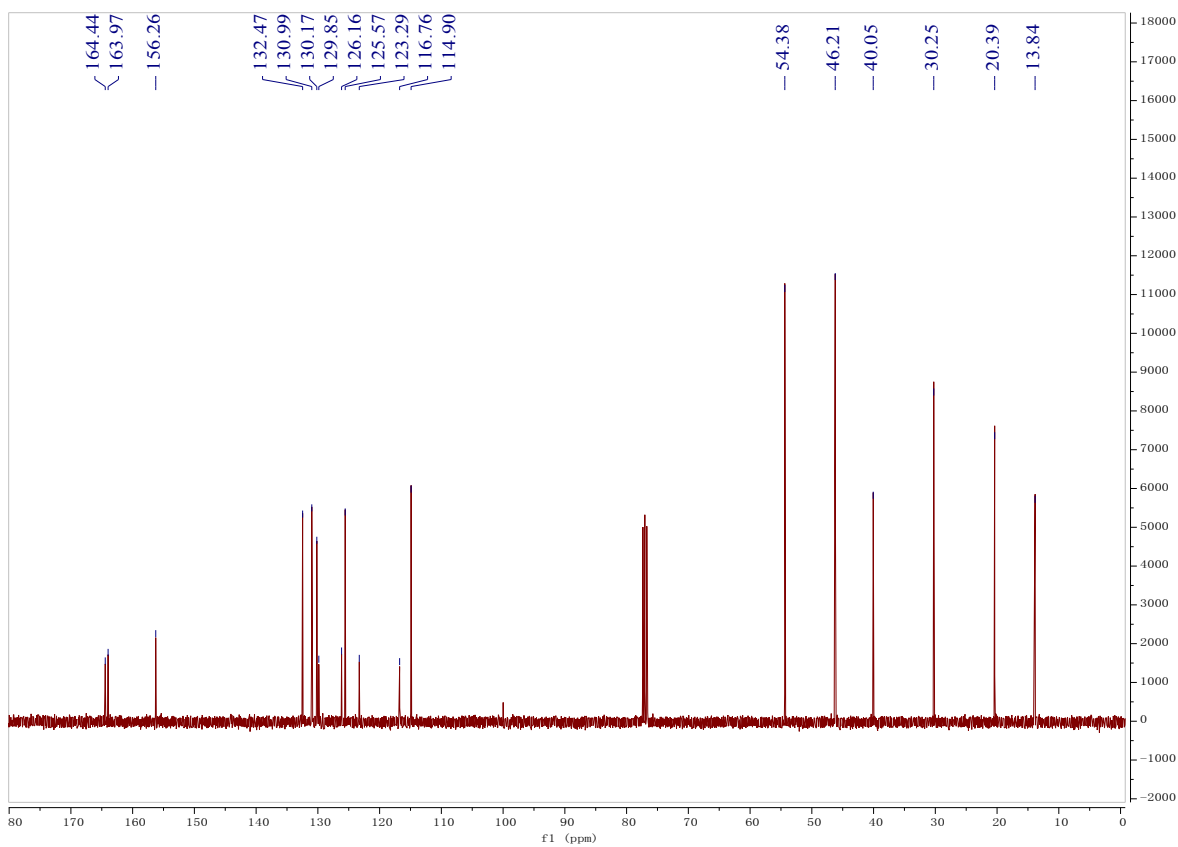

### MS spectrum of probe 2

1:MS ES+  
5.7e+007

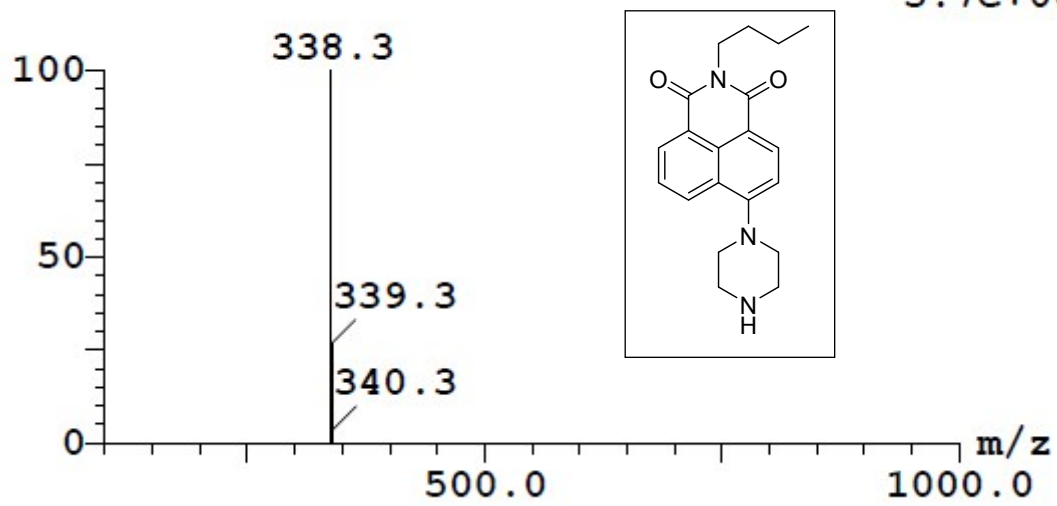

NMR spectra of compound 3

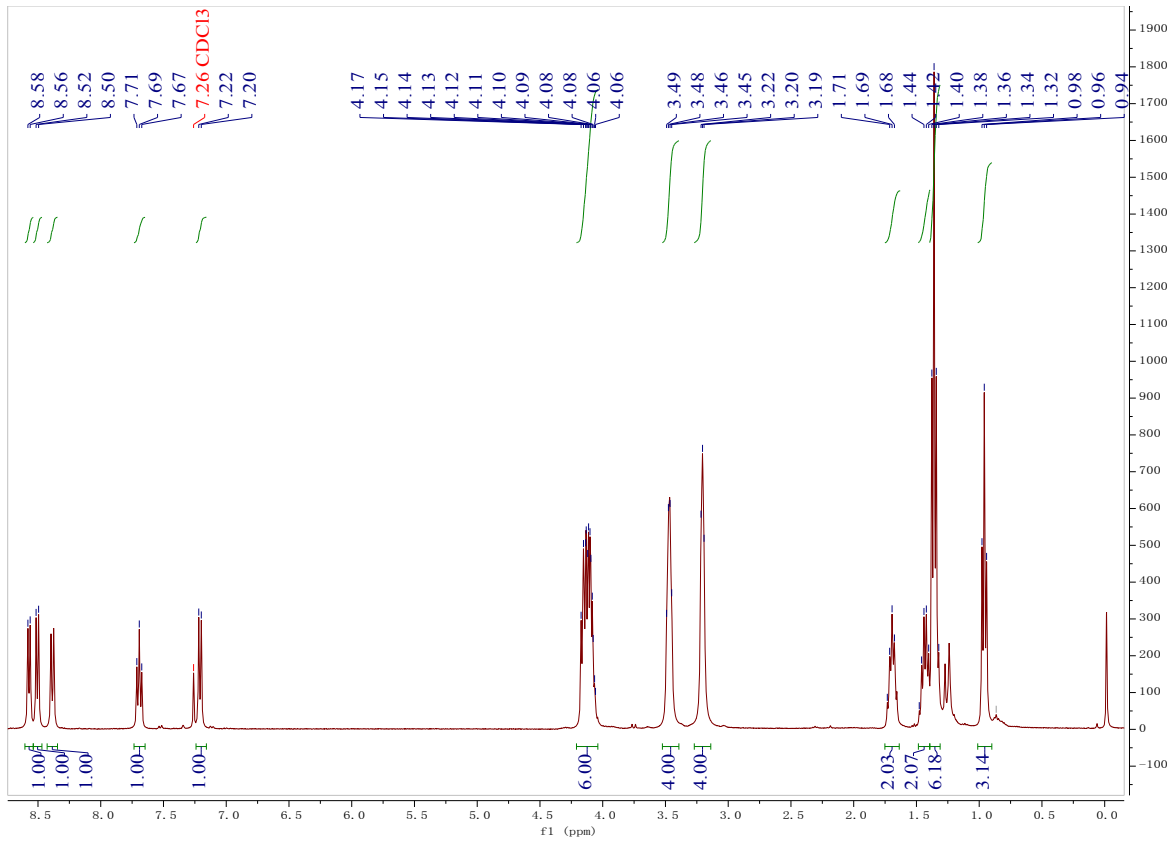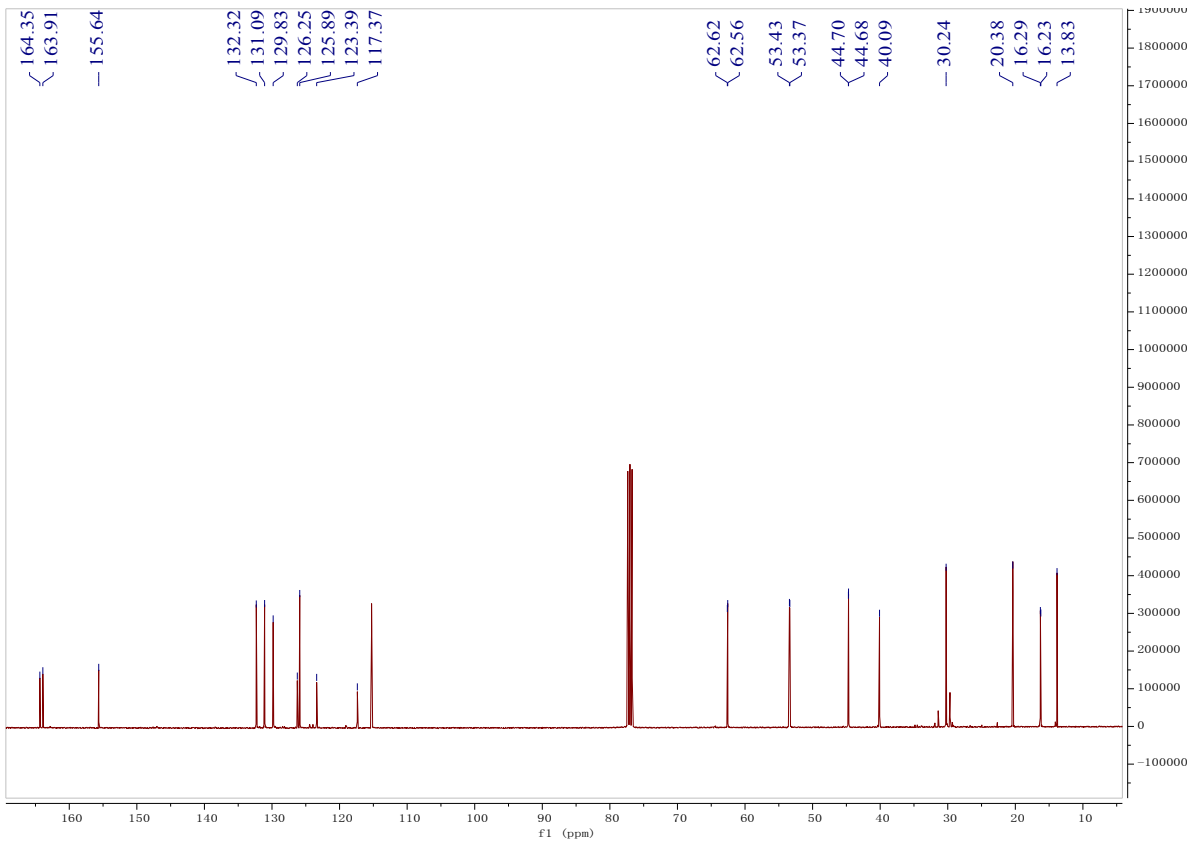



### $^{31}\text{P}$ NMR spectra of compound 3

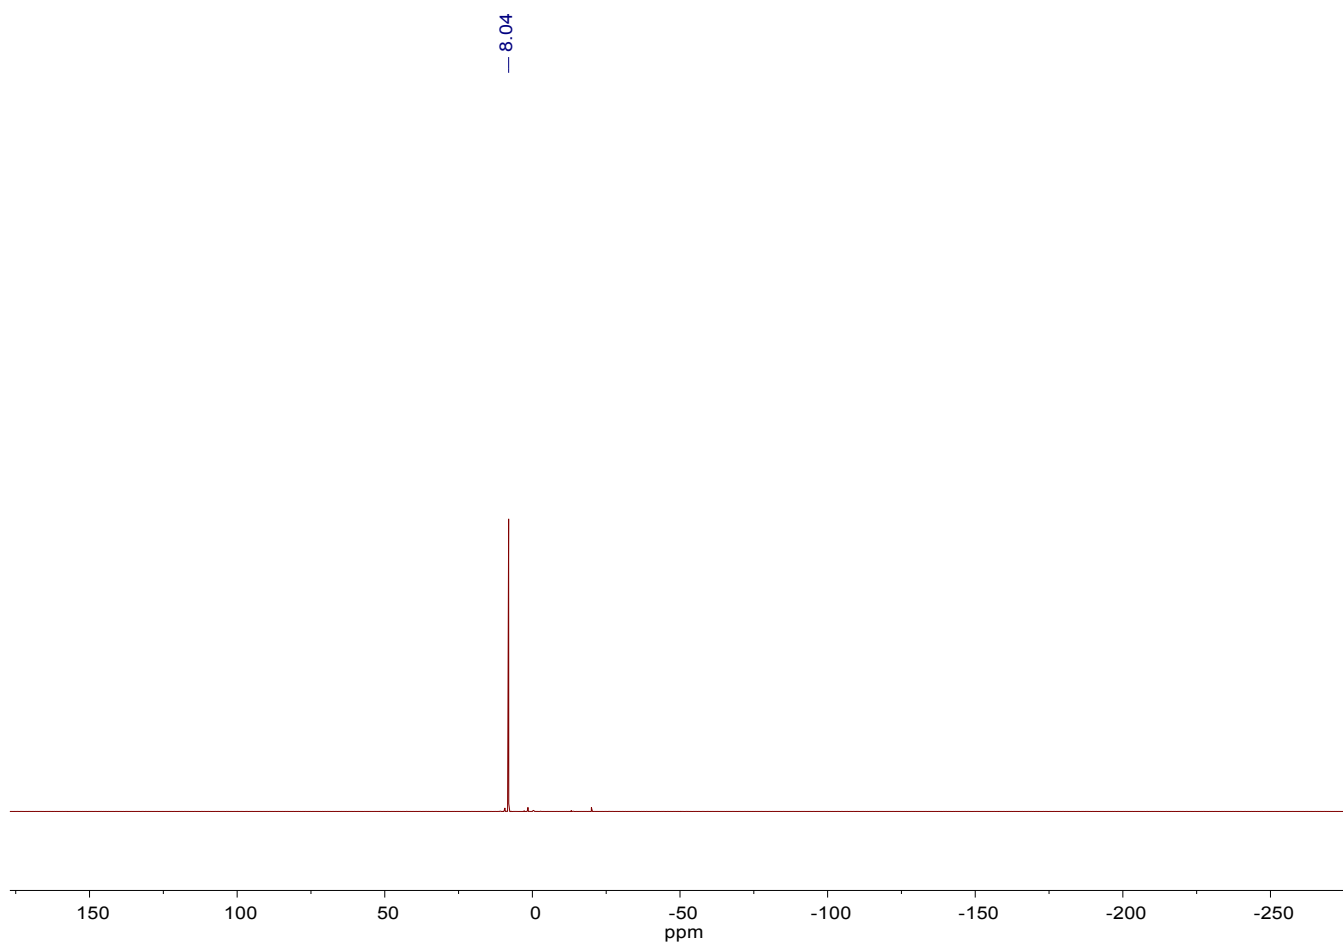

# HR-MS spectrum of compound 3

D:\w\seq\reaction-1

10/17/19 11:48:48

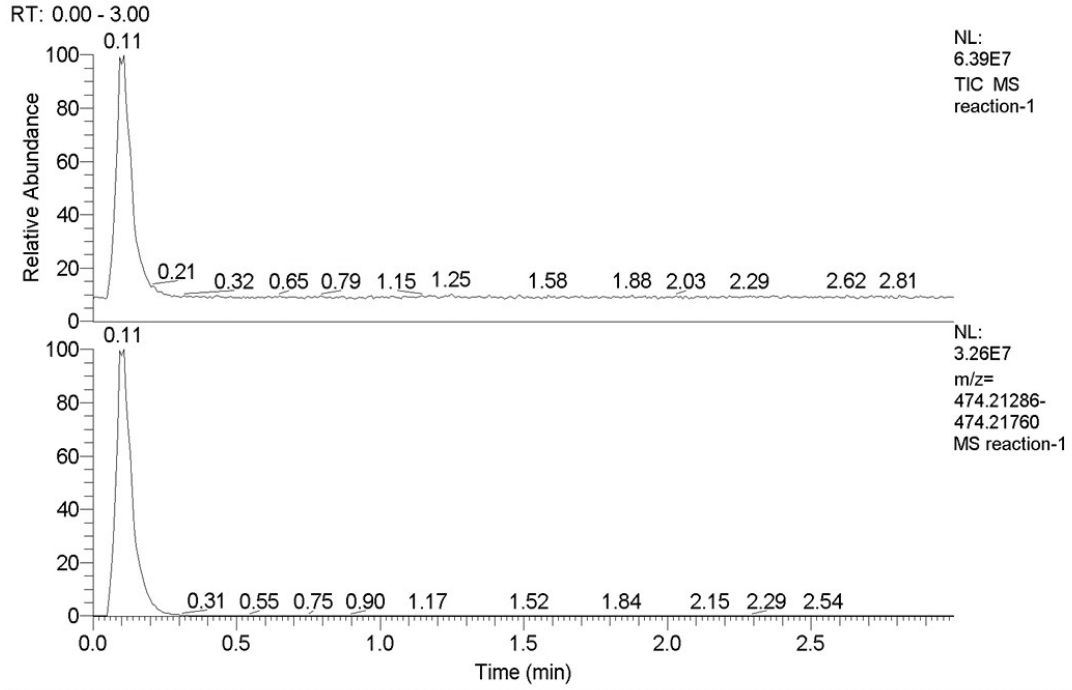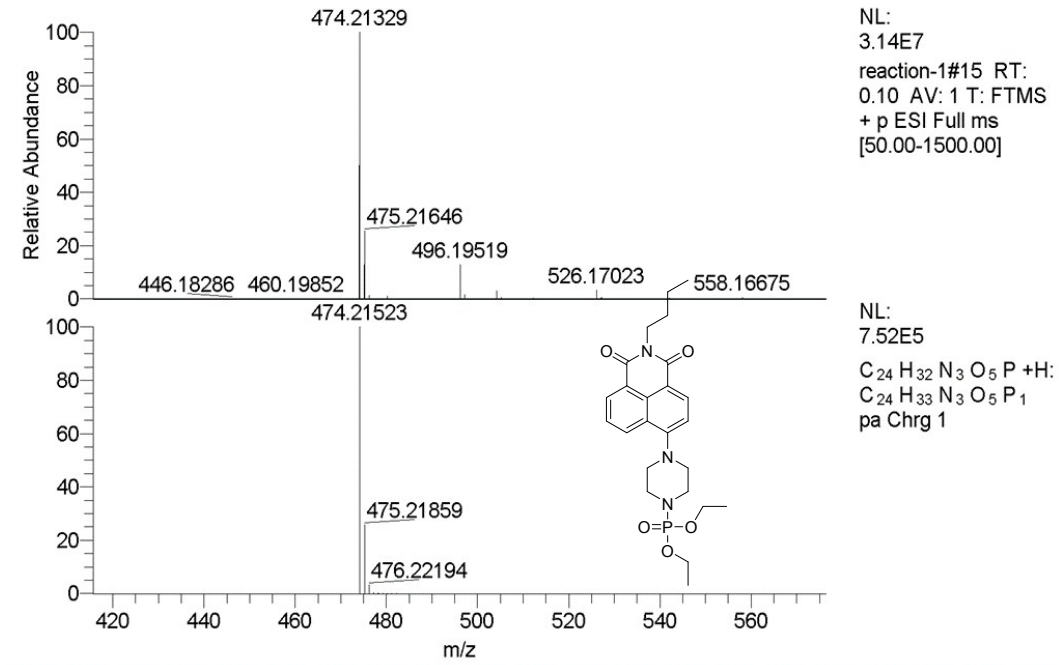

# IR spectrum of compound 3

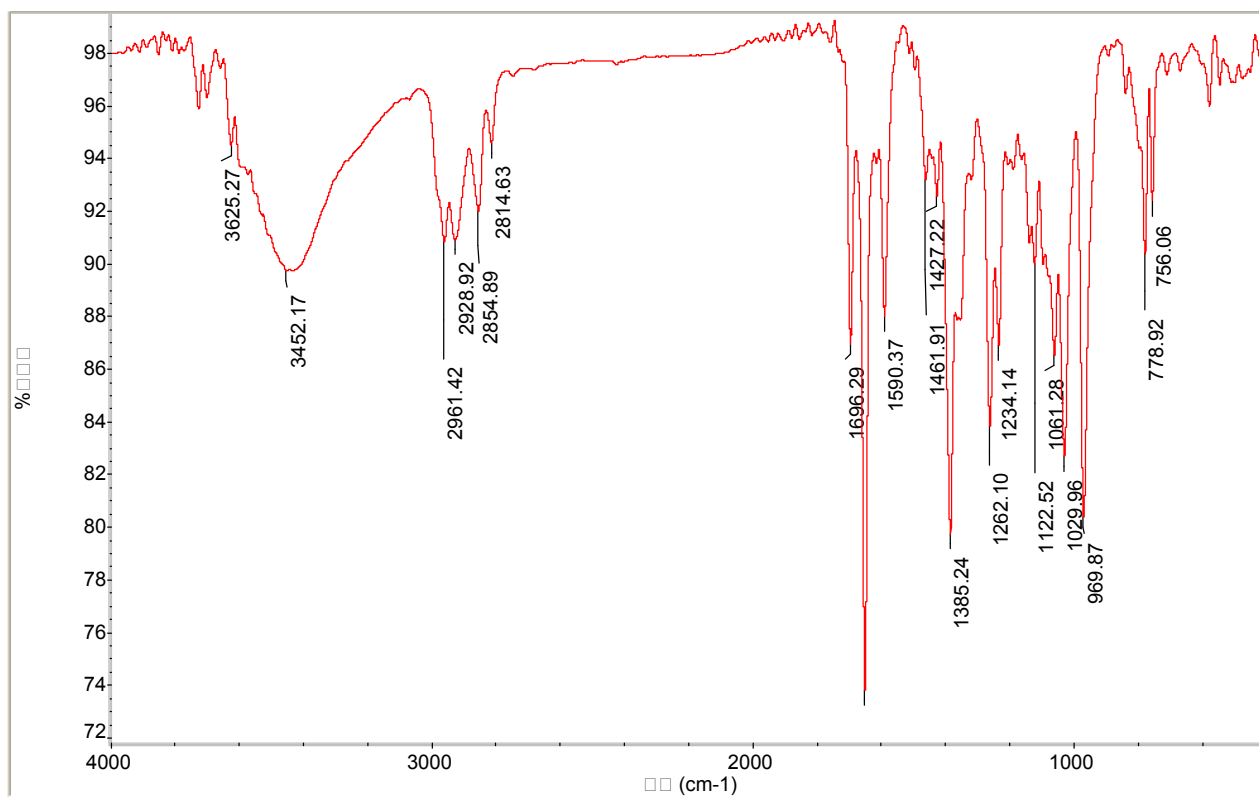

Supplement: d0nj00416b1.pdf [file d0nj00416b1.pdf]
